# Supplementary material for: Dynamic stage-specific changes in imprinted differentially methylated regions during early mammalian development and prevalence of non-CpG methylation in oocytes
Source: Oxford University Press journal article supplement (doi:10.1242/dev.061416), 2011-01-20
Supplement: dev061416tables1.pdf [file dev061416tables1.pdf]

**Table S1. Primer sequences for bisulphite methylation analysis of the primary DMRs**

| Locus/amplicon          | Sense primer (5' to 3')                 | Antisense primer (5' to 3')              |
|-------------------------|-----------------------------------------|------------------------------------------|
| <i>Nespas-Gnasxl A</i>  | GGGAGTTGAGGAGATGGGTAAT                  | AAATAACCTCTAATACAAAATTACCCCTAACTAA       |
| <i>Nespas-Gnasxl B</i>  | GGGGATGTTATTGGTATTTGGTAGGTTTAG          | CTACCACCTAAATTTTAAACACTAAAAATTAC         |
| <i>Nespas-Gnasxl C</i>  | GTAATTTTTAGTGTTTAAAATTTAGGTGGTAG        | CACACCTTACCTATCTAAAACAAAAAATCC           |
| <i>Nespas-Gnasxl C1</i> | GTAATTTTTAGTGTTTAAAATTTAGGTGGTAG        | AACACCTTTACTCTATAAAAACAATAAAAAAA         |
| <i>Nespas-Gnasxl D</i>  | GAAGAATTAGATGGGGAGGGAGG                 | CTATCACCTTCTAATTACACTTACCCC              |
| <i>Nespas-Gnasxl E</i>  | GATTATTTATTTTTATAAAGTTTGAAAATTGAGTTGGAG | CTTCTAAAAATCCACTAATCTCACTACC             |
| <i>Nespas-Gnasxl F</i>  | GAGATTGGTAGAGTTTTTATTGGGGT              | CAAAAACTAACTTAACATCCATTACTTCAAAC         |
| <i>Nespas-Gnasxl G</i>  | GTGTTGGTATATTTTGAATAATTTGTGTAGAT        | AACCTTACCAACAAAACTAAAATACCC              |
| <i>Nespas-Gnasxl H</i>  | GGGGTTGTTTAAAATATGTGATTTTGTATT          | CTTACCTTCAATCTCACTAAAACTACTTA            |
| <i>Gnas 1A A</i>        | AGGTTTTTGAAAAGTAGTTTATAATGATTTAATT      | ACACTAAAAAATATTCTCATCAAAATCAAAAACAC      |
| <i>Gnas 1A B</i>        | GGGTTTTGGGTAGGTTAATGTTAGG               | CTTCTCTATTAATAAATATCACACCCAATC           |
| <i>Gnas 1A C</i>        | GTGTGTGTTGAATGAAGAGAAGTTATAATTAGT       | ACCCACAAATACCTTATACCCAAATAAAC            |
| <i>Gnas 1A D</i>        | GTTTATTTGGGTATAAGGTTATTTGTGGGT          | CCTAAACCTACCTCCCAATTTTCC                 |
| <i>Gnas 1A E</i>        | GGTATTATGTTGAAGATGGTTATGAAGTTTAAAGTT    | AACATCATCTTCTTATCAATATCACTATCC           |
| <i>Gnas 1A E1</i>       | GGTATTATGTTGAAGATGGTTATGAAGTTTAAAGTT    | CCAACAACCTTCTTCCATCTTCTTAC               |
| <i>Gnas 1A E2</i>       | GTAAGAAGATGGAGAAGAAGTTGTTGG             | AACATCATCTTCTTATCAATATCACTATCC           |
| <i>Gnas 1A F</i>        | GGATAGTGATATTGATGAAGAAGATGATGTT         | CCCTCCTCTACAACAACAAAAC                   |
| <i>Gnas 1A F1</i>       | GGATAGTGATATTGATGAAGAAGATGATGTT         | CAACCCAAAACTACTAAAAACAACAATC             |
| <i>Gnas 1A F2</i>       | GTGTGGATTTTATTAGTATTTGTGTGG             | CCCTCCTCTACAACAACAACAAC                  |
| <i>Peg10 A</i>          | TTGATTAGAATTATTTTTATGTGATAATTTGAGG      | CAAATTTTAAAAATCACCCATCTTTCAAAAC          |
| <i>Peg10 B*</i>         | GTAAGGAATAAGGTATTTAAATATTGATGGG         | AACTCTTAAAAAATCTCAATAAACAACCTAA          |
| <i>Peg10 C</i>          | GTTTTAAGTTAAGGAAATGTTGGAGTTGAG          | CTACAAACAACACCCATTACCCCTAC               |
| <i>Peg10 D</i>          | GTAGGGTAATGGGTGTTGTTGTAG                | TCCCCAACTTAACCCCTAACC                    |
| <i>Peg10 D1</i>         | GTTTGGTTTTAGAATTTTATGATTTGTTTT          | TCCCCAACTTAACCCCTAACC                    |
| <i>Peg10 E</i>          | TGTTTTGAAAGAGGGGTGTTGTGAG               | ACATAAAAAATTCAAAAACCCACAACCC             |
| <i>Peg10 F</i>          | GTATTTAATTTGAAAAGTTGTAGGAGAG            | TACAACAAAAATAAATCCCCACCTC                |
| <i>Peg10 G</i>          | GTTTTAGAGTTAGTTTATTTGGTTTTATTTTAAAGG    | AACTATACAACCAAACTCAAAACAACAAA            |
| <i>Peg10 H</i>          | TTTGTGTTGTTGAGTTGGTTGTATAGTTT           | CAACTCAACTCAAAAACAACAACCTCC              |
| <i>Peg10 I</i>          | AGTGGTGAAGGTTATAGATTTTAAATTGGTGAT       | ACAACCTAACTCAAAATCAAAAAATACATACCTT       |
| <i>Mest A</i>           | GAAGTTTTTATTGGATATAGATAGGGTTTGGTAT      | TCTACCCTAATCAAATATATCCTTTCCCA            |
| <i>Mest B</i>           | AGAGAATAAATTTTGGTTTAAAGGAAGGGT          | CCAACAACCTAACCCCTCTACCTACC               |
| <i>Mest C</i>           | GGTAGGTAGAGGGTTAGGTTGTTGG               | TCATTTACTACTACCACAACCCCTCT               |
| <i>Mest D</i>           | TGAGTGGTTAAGATGTTATTTTGTGGA             | CAAAATCAATACTACACAACCTATTCCTACCT         |
| <i>Mest E</i>           | AGGTAGGGAATAGTTTGTGTAGTATTGATTTTG       | CCAACAACCTAAACCCCTTACTCTCT               |
| <i>Mest F</i>           | AGGAGTAAGAGGGTTTAGTTGTTGGT              | ACCCATTTTAAACACTATAACAAATTAACAAACCC      |
| <i>Mest G</i>           | AGTAGAGTATTTTATGTTGTTTGGAGGAGT          | ACCTTCACATCCTTCTATACCATAATTAC            |
| <i>Mest H</i>           | GTGAATTATGGTATAGAAGGATGTGAAGGT          | CTCTCAACCACAAAAACAATTCCAATCCAA           |
| <i>Mest H1</i>          | GTGAATTATGGTATAGAAGGATGTGAAGGT          | CACTACTAAAAACCAACTAAAACCT                |
| <i>Mest I</i>           | GAGGTGGTGGTGAAGTAATTTAGG                | CCCAACCATTTCAACTTTAATTACCTTA             |
| <i>Mest J</i>           | TAAGGTAATTAAGGTTGAGAATGGTTGGG           | CCCCTTAAAAACCTCAACTACCTACC               |
| <i>Mest J1</i>          | TAAGGTAATTAAGGTTGAGAATGGTTGGG           | CTAAAAATACCTAACACAATACCAAAACAC           |
| <i>Mest K</i>           | GGTAGGTAGTTGAGTTTTTAAAGGGG              | CCCAACTTACCATACCTAAATTTCAAAAATCC         |
| <i>Mest L</i>           | TGATTTTTGGAAGTGATAATGTTATTTTGGTTGTT     | AAATACTATAACTTACCTAACACTAAAAAC           |
| <i>Mest M</i>           | GTTTTAGTGTAGGTAAGTTATATAGTATT           | TCAAATTATCAAAACAATAAAATACCTTACCAACAATACT |
| <i>Peg3 A*</i>          | TGAGAAAAGAAGTATTTTATGGAGTATTATGGGAG     | ACCTACCCTACCCTCTACCTT                    |
| <i>Peg3 B*</i>          | AGATTGGAAATGATGGAATAAGATTAAGGG          | AACCCCAAAAAAATCTTCAATACTCTTCAT           |
| <i>Peg3 C*</i>          | GGGTTGGTTGAGGGGTAGGGT                   | CCACACCCCTTTCCCAAAAATTCTA                |
| <i>Peg3 C1*</i>         | GTTTTTTTTGAGTGATTGGGTTATAGAAGTT         | CCACACCCCTTTCCCAAAAATTCTA                |
| <i>Peg3 D*</i>          | GGGGTAAGTTTTAGGAAGGGG                   | CCCTACCCTACAACCAACCC                     |
| <i>Peg3 E*</i>          | GGTGAAGAAGGGAGTGGTAGG                   | CCTTCAATAATCACTTCAAACACACC               |
| <i>Peg3 F*</i>          | GTTAAGGAAATTTATGGGTATAGAGAATAAAG        | CTAAAAAATCTTAACTAATCTACTACATAA           |
| <i>Peg3 G*</i>          | GGGGAGTAGAATGAATAGTTAAAGATTTAAG         | CTTATTCTCTATACCCATAAATTTCTTAAAC          |
| <i>Peg3 G1*</i>         | GGATTGGGGAATTAATAATTTGATATTTTATTTA      | CTTATTCTCTATACCCATAAATTTCTTAAAC          |
| <i>Peg3 H*</i>          | GGTGGTTATTTAGGGAGAGGTTGTG               | CTTAAATCTTTAACTATTCAITCTACTCCCC          |
| <i>Peg3 I*</i>          | GTTTGATGTTGTTTTAAGATATTGAGAGGTAT        | TCTTACACAACCTCTCCCTAAATAACC              |

|                     |                                          |                                              |
|---------------------|------------------------------------------|----------------------------------------------|
| <i>Snrpn A</i>      | GGGAAAATGTATTTTATGTTAAGATTGGGAAT         | AATAAATCATCCATTTCAATTTACCAAATCC              |
| <i>Snrpn B</i>      | GAGAAGGTGGGGTGGATTATTAGT                 | ATATCTTTACCCCTCCTTTCCTACAATATC               |
| <i>Snrpn C</i>      | GATATTGTAGGAAAAGGAGGGGTAAAGATAT          | CTATACAATACTTACTTTTACCCTACTATAAA             |
| <i>Snrpn D</i>      | TTAATGAGTGGGTAAAAGTAAGTATTGTATAG         | ACTTCTAATTTAAAACCTTAAAACCTAACCCATA           |
| <i>Snrpn E</i>      | GTTTTGGTTAAATAGGATGTATTTTATTATTAG        | AACAATTATATCCATTATTCCAAATTAACAATA            |
| <i>Snrpn F</i>      | GAGGGTTTGAAGAATTGTTAATGAGGTATTT          | CCAACCCAACCATAACACATCTAT                     |
| <i>Snrpn G</i>      | GAGAGGGTATTTTGAAGTTTGGGTT                | TCAAACCTACATAAAATAAACCTACCTCACTAA            |
| <i>Snrpn H</i>      | AGTTTGGTTTATAATATGAGTTTTAGGATAGTTAGGATT  | CCTCACTATATTTTTAAAAATCTTTCAAACCTATAACCACAA   |
| <i>Snrpn I</i>      | GTGTATTAGGGGTATGTTTTTGTTTTATAGAGGT       | CCCCAACTCAAACCTAAACCTATACCC                  |
| <i>Kcnq1ot1 A</i>   | GGAGGTTTTATTGATATGTGGTGTATTTTGATT        | AAACAAATTTTTAAAACCCACATTTCTTTATAACAATAATA    |
| <i>Kcnq1ot1 B</i>   | AGATTTTTTTAGGAAAAGTTATAGATGGTTGAGG       | ACAAACCAAAAATATTTTCTAACCCACCTCC              |
| <i>Kcnq1ot1 C</i>   | GGTGGTTAGGAAAATATTTTGGTTTTGT             | AAATAATCCATTTCTACACCTATTTTCAAATAC            |
| <i>Kcnq1ot1 D</i>   | GTTGGGTGGGGTAAGTTTTAGGG                  | ACCTCCAACCATAAAAATTAATTTCACTACTACCTC         |
| <i>Kcnq1ot1 E</i>   | GTTGGGAAGGATTATGTAGAGAAAAGTATATT         | CCAAAACCAAAAACATACTCATCTTTAAACC              |
| <i>Kcnq1ot1 E1</i>  | GGGTTTGATTGGATTAATAATGTATTATTATAGA       | CCAAAACCAAAAACATACTCATCTTTAAACC              |
| <i>Kcnq1ot1 F</i>   | GTATTTGGATTGGGTGAGTTTGTATAGGAT           | CTCCCCCTCCCTAAATCCTATTTAAAATC                |
| <i>Zac1 A</i>       | AGTGTTAATTTGAGAATTGATAGTAGAGTTAAGATGT    | CCTACCCCATCCCATATAACATA                      |
| <i>Zac1 B</i>       | GGGGTTGGGAGAGTAGGTTG                     | ACACTCTTCTCCTATCCTAACCCAAA                   |
| <i>Zac1 C</i>       | TTTGGGTTAGGATAGGAGAAAAGAGTGT             | CCATCCCCAAAAATAATCCACCC                      |
| <i>Zac1 C1</i>      | TTTGGGTTAGGATAGGAGAAAAGAGTGT             | ACCAAAAAATTTAACATAAACAATAATACCAC             |
| <i>Zac1 D</i>       | TTGGGTTGGAGTTTGAGTTTGTTTTTGG             | CATTTCTCCCTCAACATAAAAAAATCTATAC              |
| <i>Zac1 E</i>       | AGAATTTGGTAGTTAAGGTTATTGTTTAGGG          | AACTAAATAAAATATATCCAACCAACCAAAATTACTT        |
| <i>Grb10 A</i>      | GGTGAAAGAAGAGGATTATATTGTTTGG             | ACTTCTTACCCTCCCATATCTAAAC                    |
| <i>Grb10 B</i>      | TTGATGGATATGAGGGGTTAAAAGG                | TTAACTACCCTTCTCATCAACTACC                    |
| <i>Grb10 C*</i>     | TTTGAATGGTTAAGTGGTGGTAGTTT               | ACAATCAAAATATAAACAATAATCTAACTACTTCTCAAAAATCT |
| <i>Grb10 C1</i>     | GTAGTAAAATGTAATAGGTGATTTGATTGTTTT        | CTAAAATTAACCTAATCATCTTTTAAACCTCACTA          |
| <i>Grb10 C2*</i>    | TTTGAATGGTTAAGTGGTGGTAGTTT               | CCCATATCTACTTACAACCCAAACTAATTC               |
| <i>Grb10 D</i>      | TGTTGGGAAGTTTGTTTTGTGAGT                 | TCACTCAAAACTCCCCTCCTC                        |
| <i>Grb10 D1</i>     | GTTTTTAGGGAATTGATTGGGTATTTTTGA           | TCACTCAAAACTCCCCTCCTC                        |
| <i>Grb10 E</i>      | GAAAAAGTTTGAGTATGGTTAAGAGAAAAGT          | CCACCTTAAACCTCTACTCCC                        |
| <i>Grb10 F</i>      | AGTATAGTTAGTTAAGGAGAGAAAATTTGGGTTT       | CACAAAATCTCAAATTTATCCCTAATTTCCA              |
| <i>U2af1-rs1 A</i>  | AAAGATTTTTAGTTGAGTGATAGTATTGTAGTTTT      | TCTCAACTCTTCTACACCATACCTA                    |
| <i>U2af1-rs1 A1</i> | AAAGATTTTTAGTTGAGTGATAGTATTGTAGTTTT      | CTAAAAATATCACTCCAATATACAAAACAATC             |
| <i>U2af1-rs1 B</i>  | GTTTGTAAGTATAAGAGTTTATGGGGAT             | TCCTACAATAAAAAACTCAACCTAAACC                 |
| <i>U2af1-rs1 C</i>  | GATTATATGAAGAGTGGTTGTGAGGG               | TCATAATCATCCCTTCTCACTACTCC                   |
| <i>U2af1-rs1 D</i>  | GGAATGGAGTAGTGTAGAAGGGATGATTATGAT        | ACCAAAATAATAACTTCTTAACTTACTATAATATTCCTCATA   |
| <i>U2af1-rs1 E</i>  | GAGGAATATTATAGTAAGTTAAGAAGTTATTATTTGGTTT | ACAAATTCCAAACCAACCAAAAATACATAA               |
| <i>Igf2r A</i>      | TGGTGGTTTTGGGTGGTAGTGA                   | AATTATCTACTCTCCCTTAAAAAACAACCCTA             |
| <i>Igf2r B</i>      | GGTGGTTAGGAAAATTTTATAGGAGTGGT            | ACCCTCATCTACAAAATCCTCCCC                     |
| <i>Igf2r C</i>      | GGGGAATTGAGGTAAGTTAGGGTTTT               | TCTTATAACCCAAAAATCTTACCCTAAC                 |
| <i>Igf2r D</i>      | GAAGGGTTTTGTGATTAGGGTTAA                 | AACACCTTCATATACCCCTAAACAC                    |
| <i>Igf2r E</i>      | TGTGTTTAGGGGTATATGAAGGTGTT               | TCCAAAATATACCAACCAATACAACAA                  |
| <i>Igf2r F</i>      | AGTTAGAGTTATTAGAGAAGGAGGAGATT            | AACTACCATAATATATACTAAACCCAAAACCAA            |
| <i>Igf2r F1</i>     | AGTTAGAGTTATTAGAGAAGGAGGAGATT            | ACTCCAAATTTCTTACTATAATAAACCCACC              |
| <i>Igf2r G</i>      | TTGGTTTTGGGTTAGTATATATTAGGTAGTT          | AACTATCCTTAACTCTCTTTATAATATCTCAATCTTAAA      |
| <i>Impact A</i>     | TTTTATGGTATTGGTATAGAGATAGGTAGGT          | ACCTCCTCCATATCTTATAAACATTTCAAAA              |
| <i>Impact B</i>     | TTTTGAATGTTTATAAGATATGGAAGGAGGT          | AAACTCTCACTCATCTTCAAACAA                     |
| <i>Impact C</i>     | TGTTTTGAAGGATGAGTATGAGAGTTTT             | CCCTACTAAAACCTTACCTACCTTAAC                  |
| <i>Impact D</i>     | GTGGTATAGATGGGTAGGGTTAG                  | CATCTTAAATTTCCCACTTTCCAA                     |
| <i>Impact E</i>     | AGGGTTGGGATTAAGATGTGTATT                 | AAATCCCCTCCTTCATATTTATAATTCTAC               |
| <i>H19 A</i>        | TTTTTATAGAAAATTAGAGGGTAAAATGATGG         | CAACATAAATAACAAATACATAAAAAACTATCACT          |
| <i>H19 B</i>        | TGAATATTTTATGATGGAATTGTTTTAGATTAGG       | CCTTCTTACTTAAAAAACTCAAAACACC                 |
| <i>H19 C</i>        | AGTGGGTGGATAAATTAGGTGGTTGA               | ACAAACACACCATTCCATAAAACACTAC                 |
| <i>H19 D</i>        | GAATGGTGTGTTGTAGGTTGGAT                  | AACAAATAAATCTCCTTCTCTCTTAAACCTC              |
| <i>H19 E</i>        | GAGGTAAAGAGAGAAGAAGGAGATTTATTTGTT        | CAACTTCAATATAACAAAATACCTAAAACACCACC          |
| <i>H19 F</i>        | AATGGGAATTTGAGGGTATGGGTTTT               | ACCCTTAAATCTCCTCCCATCTAAAAC                  |
| <i>H19 G</i>        | GTTATTGTTGTTGGGTGGATTTAAGTTATGATATTG     | ACCACACCAATAAATAACTTACATATAATAACCAACC        |
| <i>H19 H</i>        | AATGGTTGAATTTAGTTTTGTTTTATGGTT           | ACCAATACAATCCACATACTTTATCATAAAA              |

|                     |                                               |                                            |
|---------------------|-----------------------------------------------|--------------------------------------------|
| <i>H19 I</i>        | TGATTTTTTGGAGGTATTGAATTTGGGTGATT              | ACTTCTACCCTAACCAATCCCCAAATTAAC             |
| <i>H19 J</i>        | GGTAGAAAGTATAATGAGGGTAGTAAGTTTTGG             | TCCTAAAACCTCACTTTATAAACCAAACCTAACCTC       |
| <i>H19 J1</i>       | GGTAGAAAGTATAATGAGGGTAGTAAGTTTTGG             | AACACCACCATACTCACAATAATATAAAAAACAC         |
| <i>H19 K</i>        | GATGGGATATATAGATAGGATATATAGATGGGAT            | CATTATCCCCTCCATATAACACCTAC                 |
| <i>H19 L</i>        | ATGGGTATAGAGAGAAAAGAGGGAGT                    | CTTTTACAACCAAAAAACAAAACAATAATAAAAC         |
| <i>Rasgrf1 A</i>    | GAGGTAATTTTTTGGAGGGGAAGTT                     | ACTCCACATAAAAAACATAACTTCCCAC               |
| <i>Rasgrf1 B</i>    | GTATGTTATTGTGTTTTTAAGGTTGTTTTTAAA             | CTAAAAAACCTAACTCATACAAAACAAAAAAC           |
| <i>Rasgrf1 C</i>    | AGGTAGGAGATTAGTTGTGTTGGGT                     | CCCAATTATCATCAATTAAAAAATCATTAACTAAAAACCAAC |
| <i>Rasgrf1 D</i>    | TGGTTTTAGATTAATGATTTTTTAATTGATGATAATTGGGT     | ATTCTATCCTTTAAAATAACCAATAAAAAACACAATACACT  |
| <i>Rasgrf1 E</i>    | AGTGTTATTGTGTTTTATTGGTTATTTTAAAGGATAGAAT      | AAACCATCACAACAAAAACACACAACCTC              |
| <i>Rasgrf1 F</i>    | GAGTTGTGTGGTTTTTGTGATGGTTT                    | TCCTAATAACCAAAAAAACATTTTAAATCCCC           |
| <i>Rasgrf1 G</i>    | GGGATTTAAAATGTTTTTTTTGGTTATTAGGGAT            | ACATTCTCAACAAAAACAATAACCTACCTA             |
| <i>Rasgrf1 H</i>    | TGTTTTGTGAGAATGTATGTGTTAAGAGAGT               | ACCCAACCTACATAAACCAAAACAAAATAATACC         |
| <i>Rasgrf1 I</i>    | GGTATTATTTGTTGGTTTATGTAGAGTTGGGT              | AACTTTATAAACTCTCAAAAAATCCCCAAATTC          |
| <i>Rasgrf1 J</i>    | GGAATTTGGGGATTTTTAGAGAGTTATAAAGT              | CAAAAACAACAATAATAACAAAAACAAAAACAATAT       |
| <i>Rasgrf1 K</i>    | GTTATTGTTGTTTTTTTTTTTTATTGTTTTGTTTAGTTGTTA    | CAAAAACAATAAAAAATAAACAATAAAAAACAAAAACAATAC |
| <i>Rasgrf1 L</i>    | TTGTTGTTTTGTTTTATATTGTTTTGTTTAGATATTATTGTTG   | CAAATCTAATCTTCTCATCAAAATATCTCCAACATA       |
| <i>Rasgrf1 M</i>    | TAGTTGGAGATATTTGATGAGGAAGATTAGATTTG           | AACCATCCTAATTAACAAAAACAAACCC               |
| <i>Rasgrf1 N</i>    | TTTTGTTGTTTTAGTATGTTAAGATTGAAATGTGAATT        | TTCCAACCACATATAAATTCACATACCTT              |
| <i>Rasgrf1 O</i>    | AAGGTATGTGAATTTATATGTGGTTGGGAA                | TCCATTCCTCCCTCCAAAAAACAC                   |
| <i>Rasgrf1 P</i>    | AAATTTGAATTTGGAATTTATTAGTTGGGGGA              | ACCCTAAAAACAAAAACAATCAAAACTCTCT            |
| <i>Rasgrf1 Q</i>    | TTGTTTTAGGGTTTTTGTAAAGTTTATTGGA               | ATAACCCCCATTTATTCAAATACAAAAACC             |
| <i>Rasgrf1 R</i>    | TGGGAGGAAGGATTGTGTATATATGGAT                  | ACTTCCAAAAACTCTCTACTTTCTCTA                |
| <i>Rasgrf1 S</i>    | GGTTTGAATTTGTAGGTTATGAGTTTTGTATG              | CTACACAACCTATTCTAACACTCAACC                |
| <i>Rasgrf1 T</i>    | GGGTATTTGATTTGTTAGTTGGTATTATTAGTTA            | TAAATAACAACCTTCATCAACTTAATCTATAAAAC        |
| <i>Rasgrf1 U</i>    | TAAGTTGGATGTTAGGGATAGTGTGTA                   | TAACAAATAAACTCCCTACTACTACTC                |
| <i>Dlk1-Gtl2 A</i>  | GATAGGTTTTAGTGAATATTAGGGAGGTATTT              | CAAATCCCCTCAACACAAATTCTACA                 |
| <i>Dlk1-Gtl2 B</i>  | AGGTTAAGATTTAATGATAGAAAGGTTAGGTT              | TCTCCATTCTCTCCAACCAATAAAAAAC               |
| <i>Dlk1-Gtl2 C</i>  | GTTTTATTGGTTGGAGAGAATGGAGA                    | TCTAAACATTTCTACACCCCCACC                   |
| <i>Dlk1-Gtl2 D</i>  | GTTTGGGATTTATGGGGTATTTTAAAGATTATT             | ACCACCTCAACACAACCTACATA                    |
| <i>Dlk1-Gtl2 E</i>  | AGGGAATAGGATGTATTATGGAGTAATGT                 | AAACACCTAACCTATATTACAATACATCCATA           |
| <i>Dlk1-Gtl2 F</i>  | ATATGGATGTATTGTAATATAGGTTAGGTTGTT             | AATACACCATAACATAAAACATAAAAAATCCACAA        |
| <i>Dlk1-Gtl2 G</i>  | GTGTTGTAATTAGTTATAGTGGAGAGATATGTT             | TCCCCCACCAAAAACTAACC                       |
| <i>Dlk1-Gtl2 H</i>  | TTATTATTTGTGGTTATTTTTATTTAGAGAAAAGTTTTATTGTTG | TCCTTAAAACCTCAAAAAACCAAAATTATAATCTC        |
| <i>Dlk1-Gtl2 I</i>  | AGGAAGGGTAGTAGGGAATTTGTT                      | ATCCAACCCAACCAAAATCCATAAAC                 |
| <i>Dlk1-Gtl2 J</i>  | GGTGGGAGAGAAGAGTTGTATAATGTT                   | TCTATCTAACTCCAAAAACAAACATCTTAA             |
| <i>Dlk1-Gtl2 K</i>  | GTTTTTGAAGGTAGTTTGTGTTTGT                     | CCCTCAAATTAACCTCTCAATAAATATCC              |
| <i>Dlk1-Gtl2 L</i>  | TGGAGGGTTAAGTGGGTTAGTTTTAAG                   | CCCTAAATCAACTATAAAAAATATATATACCAACAA       |
| <i>Dlk1-Gtl2 M</i>  | GTTTTTATGTTGGGAGATATAGGAATATAGTTTAT           | AACAACCCTAACTCCCTAAAAAAAATC                |
| <i>Snrnp70</i>      | TTATTTTTAGAGGTAAGTTAAGGTGGAAAAG               | AAAACCTAACCTAAAAACCTAATAACC                |
| <i>Pard6b</i>       | GGATTAGGTGATTGATATGATGATAGTTAATAGT            | ACTTCCAACCTATATCCAACCTACC                  |
| <i>Lambda DNA A</i> | GTTATTTTAAAATGTTGTTGGGTGTTTAT                 | CCTATTCAATATCATCATCAAAAAACAA               |
| <i>Lambda DNA B</i> | GTTTTGTTGGAGTTAGTATGGAATAGTAA                 | ATTCTAAATACCATTATACAAACCTACAATA            |

\*Primers designed on the antisense strand.
