# Supplementary figures and images for: Dynamic stage-specific changes in imprinted differentially methylated regions during early mammalian development and prevalence of non-CpG methylation in oocytes
Source: Oxford University Press journal article supplement (doi:10.1242/dev.061416), 2011-01-20

**A**

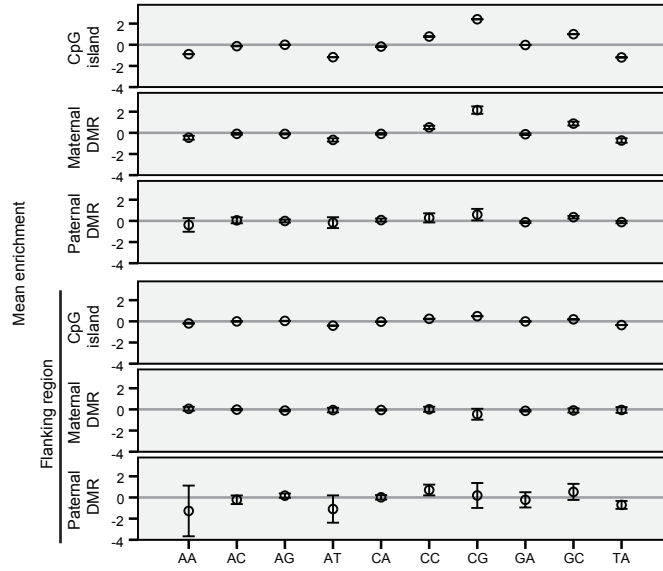

**B**

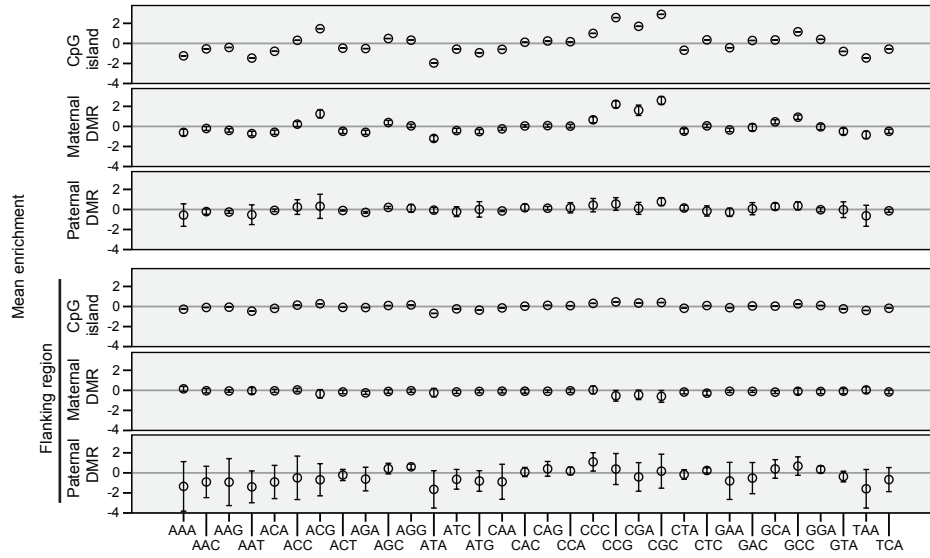

**C**

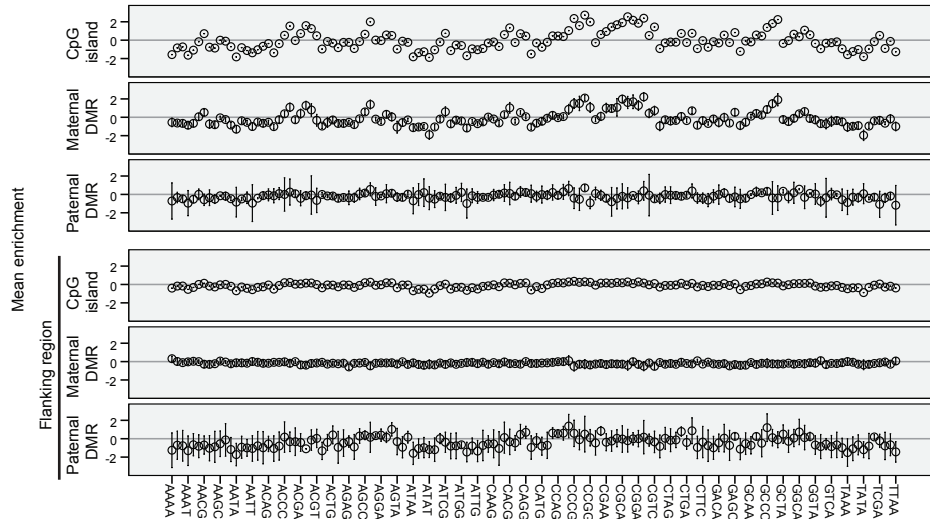

Supplement: dev061416figs2.pdf [file dev061416figs2.pdf]

**A**

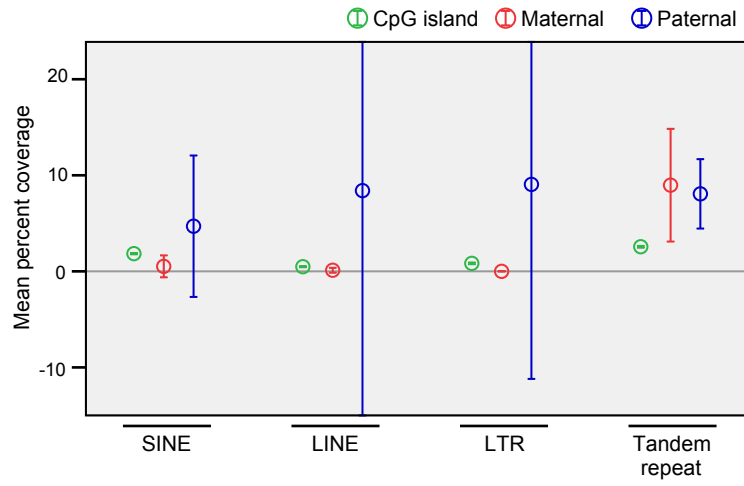

**B**

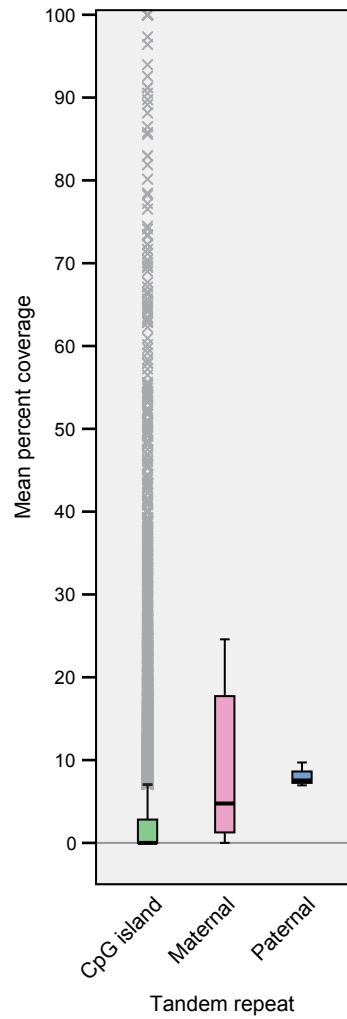

Supplement: dev061416figs3.pdf [file dev061416figs3.pdf]

# Tomizawa\_FigS4

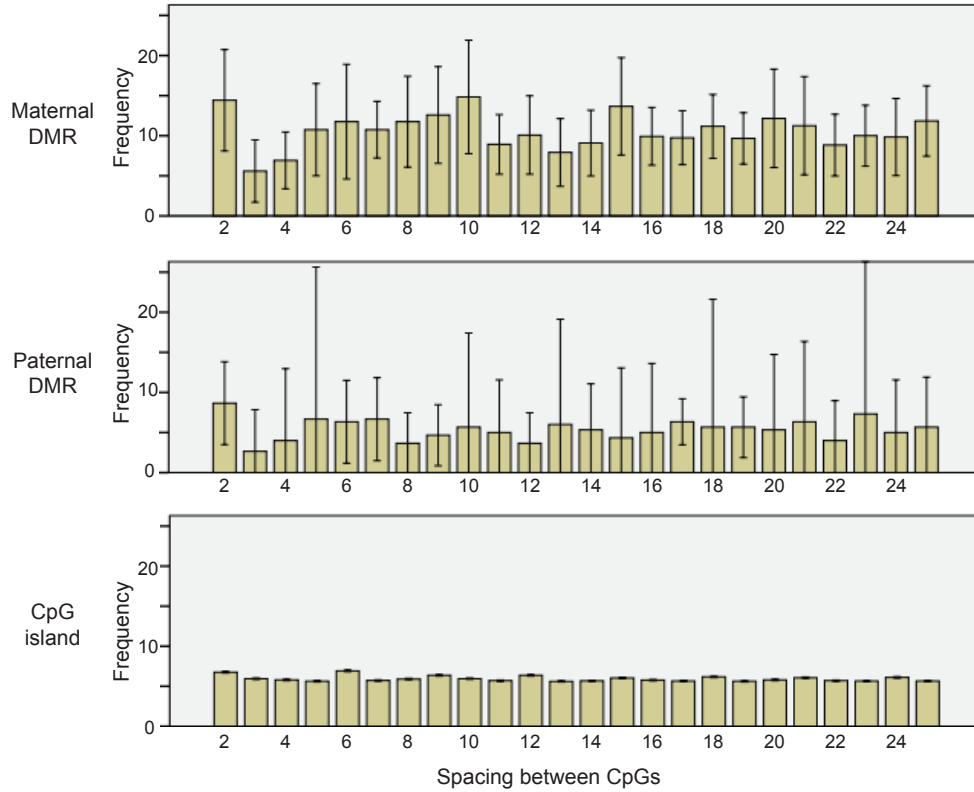

Supplement: dev061416figs4.pdf [file dev061416figs4.pdf]

# Tomizawa\_FigS5

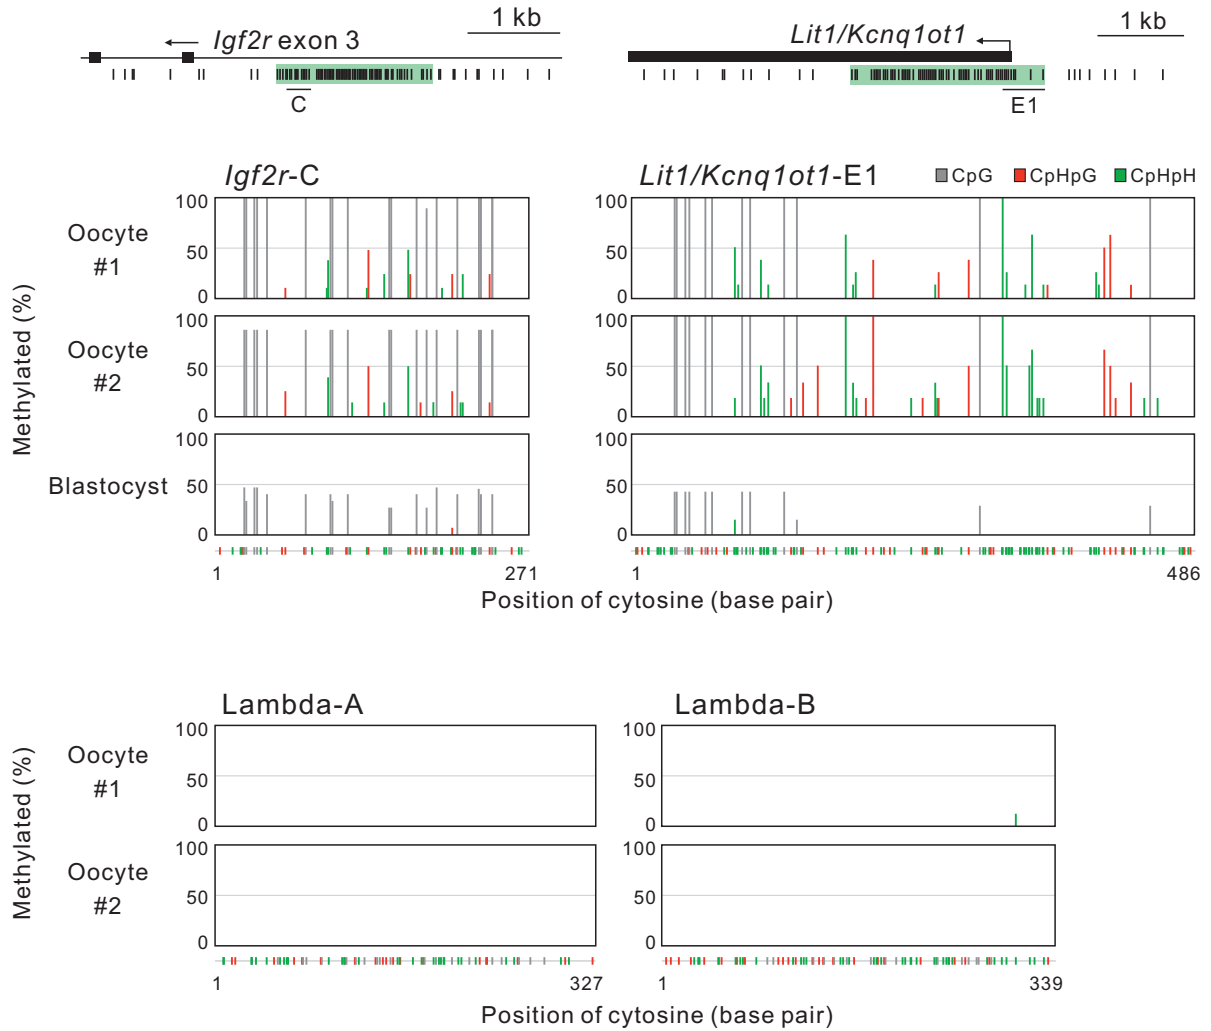

Supplement: dev061416figs5.pdf [file dev061416figs5.pdf]

# Tomizawa\_FigS6

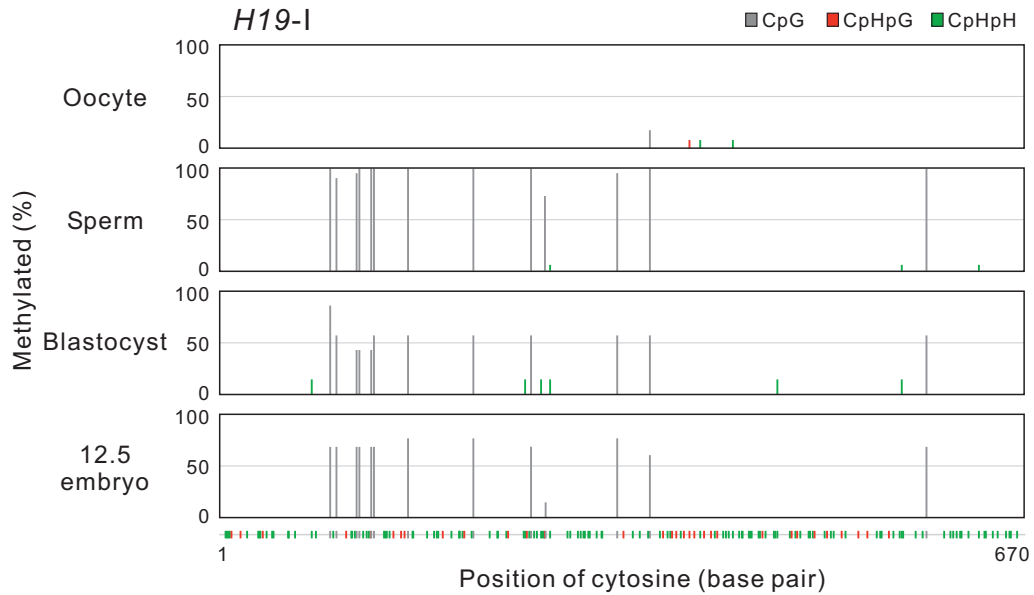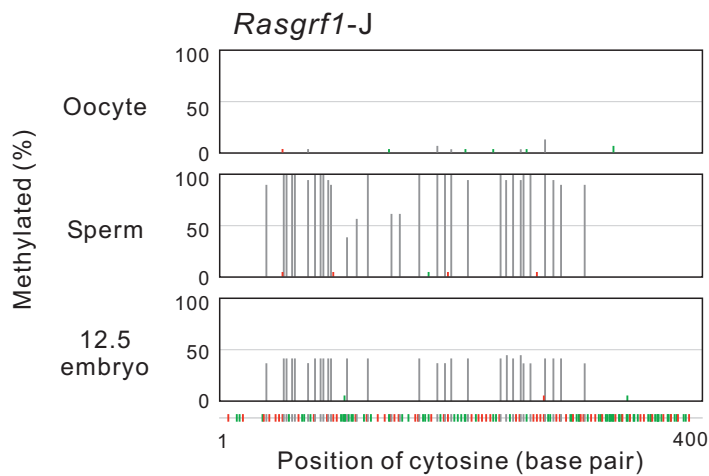

Supplement: dev061416figs6.pdf [file dev061416figs6.pdf]
